# Supplementary material for: Evaluation of high resolution ultrasound as a tool for assessing the 3D volume of blood clots during in vitro thrombolysis
Source: PubMed Central journal article supplement (PMC5524902; doi:10.1038/s41598-017-06089-z), 2017-07-24
Supplement: 41598_2017_6089_MOESM1_ESM.pdf [file 41598_2017_6089_MOESM1_ESM.pdf]

# Evaluation of high resolution ultrasound as a tool for assessing the 3D volume of blood clots during *in vitro* thrombolysis

Laurent Auboire<sup>1</sup>, Jean-Michel Escoffre<sup>1</sup>, Damien Fouan<sup>1</sup>, Jean-René Jacquet<sup>1</sup>, Frédéric Ossant<sup>1,2</sup>, Jean-Marc Grégoire<sup>1</sup>, Ayache Bouakaz<sup>1\*</sup>

<sup>1</sup>UMR Inserm U930, Université François-Rabelais de Tours, France.

<sup>2</sup>CHRU de Tours, CIC-IT, 37044 Tours cedex, France.

Corresponding author: A. Bouakaz, Ph.D., UMR Inserm U930 Imagerie et Cerveau, Université François-Rabelais. 10 bd Tonnellé, 37032 Tours Cedex 1, France. Tel: +33(0)247366142.

Email address: [ayache.bouakaz@univ-tours.fr](mailto:ayache.bouakaz@univ-tours.fr)

**Video 1: 3D Reconstruction of clot volume at T0 and T30 in the Rt-PA (3µg/ml) condition in the stenosis setup.**
